# Supplementary material for: Comprehensive characterization of driver genes in diffuse large B cell lymphoma
Source: PubMed Central journal article supplement — Oncol Lett. 2020 Apr 21;20(1):382–90. doi: 10.3892/ol.2020.11552 (PMC7285964; doi:10.3892/ol.2020.11552), 2020-04-21
Supplement: Supplementary_Data.pdf [file Supplementary_Data.pdf]

Figure S1. Characterization of somatic mutations in DLBCL. (A) Number and proportion of mutation classes with different functional impact in DLBCL. (B) Somatic mutation signatures in DLBCL. (C) Difference in mutation densities in MMR-mutant and MMR-wildtype DLBCL samples. Mb, million bases; DLBCL, diffuse large B cell lymphoma; MMR, mismatch-repair pathways; Ins, insertion; Del, deletion.

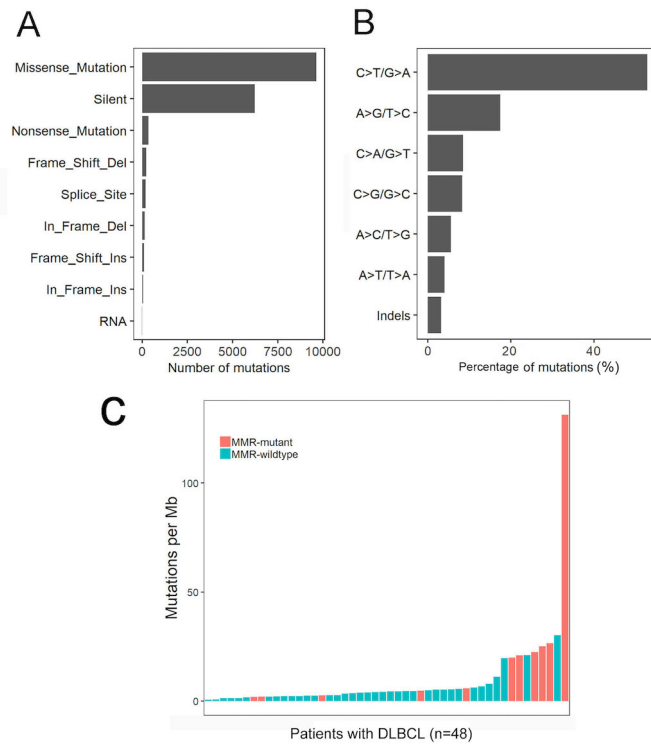



Figure S3. Unsupervised hierarchical clustering of the 20 driver genes with the most frequent gene-level copy-number alterations. The gene-level copy-number alterations of the top 20 driver genes were clustered using the heatmap function in R. Dark red, red, white, blue and dark blue represent high level amplification, amplification, copy-neutral, deletion and high-level deletion, respectively.

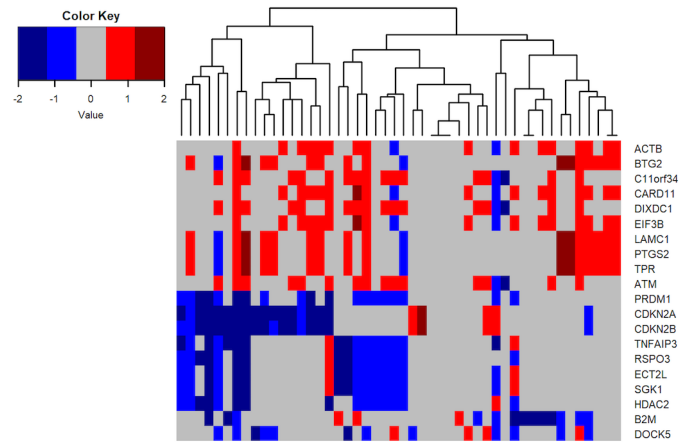

Table SI. Driver genes detected using OncodriveFM in patients with diffuse large B cell lymphoma.

| Gene     | P-value | Q-value |
|----------|---------|---------|
| ZNF814   | <0.001  | <0.001  |
| HLA-C    | <0.001  | <0.001  |
| CD79B    | <0.001  | <0.001  |
| RHPN2    | <0.001  | <0.001  |
| MYD88    | <0.001  | <0.001  |
| EZH2     | <0.001  | 0.02    |
| PIM1     | 0.05    | 0.03    |
| MLL2     | <0.001  | <0.001  |
| PDE4DIP  | 0.01    | 0.04    |
| SOCS1    | 0.05    | 0.03    |
| IRF4     | 0.03    | 0.01    |
| CARD11   | 0.04    | 0.01    |
| TNFAIP3  | <0.001  | 0.01    |
| P2RY8    | <0.001  | 0.03    |
| HLA-A    | <0.001  | <0.001  |
| CIITA    | <0.001  | 0.01    |
| PRDM1    | <0.001  | <0.001  |
| ARID1A   | <0.001  | <0.001  |
| TP53     | <0.001  | 0.01    |
| STAT6    | 0.04    | 0.01    |
| MSN      | 0.01    | 0.01    |
| PTEN     | 0.02    | 0.01    |
| BTG2     | 0.02    | 0.01    |
| B2M      | <0.001  | <0.001  |
| POLQ     | 0.01    | 0.04    |
| ACTB     | <0.001  | <0.001  |
| ACTG1    | 0.01    | <0.001  |
| FLNC     | <0.001  | 0.03    |
| NFKBIE   | <0.001  | <0.001  |
| PCDH7    | 0.01    | 0.01    |
| UBE2A    | 0.01    | 0.01    |
| CSNK2A1  | <0.001  | <0.001  |
| PTPN6    | <0.001  | <0.001  |
| FLNA     | 0.02    | 0.03    |
| DDX3X    | 0.12    | <0.001  |
| HLA-B    | 0.01    | <0.001  |
| DHX33    | 0.03    | 0.03    |
| CGN      | 0.01    | 0.02    |
| VANGL1   | <0.001  | 0.01    |
| HFE      | 0.01    | <0.001  |
| ATP6V0A1 | 0.01    | <0.001  |
| POLD3    | 0.01    | 0.03    |
| TNPO1    | 0.04    | 0.01    |
| CSNK1A1  | 0.02    | <0.001  |
| DGCR8    | 0.02    | 0.03    |
| LYN      | 0.02    | <0.001  |
| ZMYM4    | 0.05    | 0.01    |

Driver genes were predicted by oncodriveFM (v0.0.1) (<https://www.intogen.org>). OncodriveFM compares the actual functional impact with a null distribution model generated by 1,000,000 permutations and computes the raw P-values by calculating the fraction of permuted functional scores greater than the actual one. Benjamini-Hochberg false discovery rate procedure was used to calculate the q values for genes in the oncodriveFM analysis.

Table SII. Driver genes detected by OncodriveCluster in patients with diffuse large B cell lymphoma.

| Gene     | P-value | Q-value |
|----------|---------|---------|
| ZNF814   | <0.001  | <0.001  |
| HLA-C    | <0.001  | 0.01    |
| CD79B    | <0.001  | <0.001  |
| RHPN2    | <0.001  | <0.001  |
| MYD88    | 0.01    | 0.03    |
| EZH2     | <0.001  | <0.001  |
| KDR      | <0.001  | 0.01    |
| MLH1     | <0.001  | <0.001  |
| MCM8     | <0.001  | <0.001  |
| HLA-DRB1 | 0.01    | 0.02    |
| UBXN11   | <0.001  | 0.01    |
| SCYL1    | <0.001  | 0.01    |

Driver genes were predicted by oncodriveCLUST v.0.4.1 (<https://www.intogen.org>). OncodriveCLUST performed the following steps to calculate P-values for genes. First, protein affecting mutations of each gene across a cohort of tumors are evaluated looking for those protein residues having a number of mutations barely expected by chance. Second, these positions are thereafter grouped to form mutation clusters. Third, each cluster is scored with a figure proportional to the percentage of the gene mutations that are enclosed within that cluster and inversely related to its length. The gene clustering score is obtained as the sum of the scores of all clusters (if any) found in that gene. Finally, each gene clustering score is compared with the background model to obtain a P-value. Background model is obtained performing the same steps than above but assessing only coding silent mutations. Benjamini-Hochberg false discovery rate procedure was used to calculate the q values for genes in the oncodriveCLUST analysis.

Table SIII. Driver genes detected by iCAGES in patients with diffuse large B cell lymphoma.

| Gene    | iCAGES |
|---------|--------|
| TP53    | 1.00   |
| EGFR    | 0.98   |
| CDKN1A  | 0.98   |
| CREBBP  | 0.98   |
| MYC     | 0.97   |
| RAF1    | 0.97   |
| STAT3   | 0.96   |
| BRCA1   | 0.96   |
| GRB2    | 0.95   |
| MAP2K1  | 0.94   |
| MAPK8   | 0.93   |
| PDGFRB  | 0.92   |
| CDH1    | 0.91   |
| STAT1   | 0.91   |
| PIK3CG  | 0.90   |
| PTGS2   | 0.88   |
| CDKN2A  | 0.88   |
| ATM     | 0.87   |
| PIK3CD  | 0.85   |
| IKBKB   | 0.85   |
| RHOA    | 0.85   |
| TGFB2   | 0.84   |
| FAS     | 0.84   |
| PLCG2   | 0.83   |
| HDAC2   | 0.82   |
| PRKCD   | 0.81   |
| AKT2    | 0.81   |
| CDKN2B  | 0.81   |
| CD44    | 0.81   |
| MLH1    | 0.80   |
| GATA2   | 0.79   |
| SOCS1   | 0.79   |
| TNF     | 0.78   |
| ITPR1   | 0.77   |
| PTCH1   | 0.76   |
| ITGA5   | 0.76   |
| CHEK2   | 0.74   |
| PPARG   | 0.74   |
| FGF5    | 0.74   |
| PTPN6   | 0.73   |
| IL6     | 0.72   |
| FLT1    | 0.72   |
| FN1     | 0.71   |
| SOS2    | 0.71   |
| GNAI2   | 0.70   |
| GAB1    | 0.70   |
| GNAQ    | 0.69   |
| LYN     | 0.69   |
| MMP2    | 0.69   |
| KITLG   | 0.68   |
| NFKB2   | 0.68   |
| SMARCA4 | 0.67   |
| COL4A1  | 0.67   |
| ADCY3   | 0.67   |
| ITGB4   | 0.66   |

Table SIII. Continued.

| Gene    | iCAGES |
|---------|--------|
| TLR4    | 0.66   |
| UBB     | 0.66   |
| ITPR2   | 0.65   |
| ABCB1   | 0.65   |
| KAT2B   | 0.65   |
| ACTB    | 0.64   |
| SMAD7   | 0.64   |
| E2F2    | 0.63   |
| INHBA   | 0.63   |
| CAV1    | 0.63   |
| ADCY6   | 0.62   |
| PPP2CA  | 0.62   |
| WNT5A   | 0.61   |
| TPR     | 0.61   |
| XPO1    | 0.61   |
| CCND3   | 0.60   |
| AXIN2   | 0.60   |
| BMP2    | 0.60   |
| FZD1    | 0.59   |
| RPTOR   | 0.59   |
| TCF7L1  | 0.59   |
| TLR2    | 0.58   |
| PCK2    | 0.58   |
| SMO     | 0.58   |
| SKP1    | 0.57   |
| CXCR4   | 0.56   |
| LEPR    | 0.56   |
| RAPGEF3 | 0.56   |
| MAP2K3  | 0.56   |
| NGFR    | 0.56   |
| TLN1    | 0.56   |
| JAK3    | 0.56   |
| PLCB4   | 0.56   |
| RET     | 0.56   |
| SHH     | 0.55   |
| STAT6   | 0.55   |
| PPP1CA  | 0.55   |
| WNT10A  | 0.55   |
| PGR     | 0.55   |
| CBLC    | 0.54   |
| MAP2K4  | 0.54   |
| ATR     | 0.54   |
| LAMC1   | 0.53   |
| VAV3    | 0.53   |
| BIRC2   | 0.53   |
| JUP     | 0.53   |
| NOTCH3  | 0.52   |
| NCOA2   | 0.52   |
| CUL1    | 0.52   |
| GATA3   | 0.51   |
| NF1     | 0.51   |
| IL6ST   | 0.50   |
| F2R     | 0.50   |
| FZD7    | 0.50   |

The driver genes were predicted by Integrated Cancer Genome Score (iCAGES, <https://github.com/WGLab/icages>).

Table SIV. Driver genes detected using Driver Genes and Proteins in patients with diffuse large B cell lymphoma.

| Gene     | P-value | Q-value |
|----------|---------|---------|
| AGA      | 0.01    | 1.00    |
| APMAP    | 0.05    | 1.00    |
| BTG2     | <0.001  | 1.00    |
| C11orf34 | 0.03    | 1.00    |
| C1orf87  | <0.001  | 1.00    |
| CARS2    | 0.02    | 1.00    |
| CBX3     | <0.001  | <0.001  |
| CYYR1    | 0.03    | 1.00    |
| DIXDC1   | 0.05    | 1.00    |
| DLGAP1   | <0.001  | 1.00    |
| DOCK5    | 0.04    | 1.00    |
| ECT2L    | 0.04    | 1.00    |
| EIF3B    | 0.03    | 1.00    |
| ETV6     | 0.04    | 1.00    |
| FAIM     | 0.02    | 1.00    |
| FAM161A  | 0.01    | 1.00    |
| FAS      | <0.001  | 0.50    |
| FGGY     | <0.001  | 1.00    |
| GTF2A1   | 0.04    | 1.00    |
| IGLL5    | <0.001  | <0.001  |
| IKBKB    | 0.04    | 1.00    |
| IZUMO3   | 0.01    | 1.00    |
| KCNH8    | 0.04    | 1.00    |
| KLF2     | 0.01    | 1.00    |
| KLRC4    | <0.001  | 1.00    |
| L3MBTL4  | 0.05    | 1.00    |
| LALBA    | 0.02    | 1.00    |
| LARP1B   | 0.03    | 1.00    |
| MMEL1    | 0.04    | 1.00    |
| NOTUM    | <0.001  | 0.69    |
| NTN4     | 0.01    | 1.00    |
| NUP153   | 0.02    | 1.00    |
| PABPC1   | <0.001  | 0.45    |
| PDCL3    | 0.03    | 1.00    |
| PFN1     | 0.01    | 1.00    |
| PPP2R2B  | 0.02    | 1.00    |
| RBMS3    | <0.001  | 1.00    |
| RECQL4   | <0.001  | <0.001  |
| RIF1     | 0.03    | 1.00    |
| RIMS4    | <0.001  | 0.51    |
| RRAS2    | 0.04    | 1.00    |
| RSPO3    | 0.02    | 1.00    |
| SFTPD    | <0.001  | 1.00    |
| SGK1     | 0.03    | 1.00    |
| SLC16A8  | 0.03    | 1.00    |
| SPECC1   | 0.03    | 1.00    |
| TECRL    | 0.03    | 1.00    |
| TGIF2    | 0.02    | 1.00    |
| TMEM168  | 0.01    | 1.00    |
| TMPO     | 0.04    | 1.00    |
| TMSB4X   | 0.02    | 1.00    |
| TNF      | <0.001  | 0.74    |
| TP53     | 0.01    | 1.00    |
| TYRO3    | 0.02    | 1.00    |
| UBE2A    | <0.001  | 0.02    |

Table SIV. Continued.

| Gene   | P-value | Q-value |
|--------|---------|---------|
| UBXN2B | 0.03    | 1.00    |
| UNC13B | 0.01    | 1.00    |
| ZBTB17 | 0.01    | 1.00    |
| ZNF675 | 0.01    | 1.00    |

The driver genes were predicted by Driver Genes and Proteins (DrGaP, <https://code.google.com/archive/p/drgap/>). DrGaP integrates biological knowledge of the mutational process in tumors, including the length of protein-coding regions, transcript isoforms, variation in mutation types, differences in background mutation rates, redundancy of the genetic code and multiple mutations in one gene. DrGaP use a Poisson process to model the random nature of somatic mutations, a Bayesian model to estimate background mutation rates and a likelihood ratio test to test the significance of driver genes and pathways. The Benjamini-Hochberg method is used to control false discovery rate (FDR) of P-values.

Table SV. Mutation frequencies of 208 driver genes in patients with diffuse large B cell lymphoma (n=48).

| Driver gene | Number of patients with mutations | Mutation frequency |
|-------------|-----------------------------------|--------------------|
| IGLL5       | 20                                | 0.42               |
| MLL2        | 17                                | 0.35               |
| BTG2        | 16                                | 0.33               |
| B2M         | 13                                | 0.27               |
| PIM1        | 12                                | 0.25               |
| CARD11      | 10                                | 0.21               |
| ATM         | 9                                 | 0.19               |
| EGFR        | 8                                 | 0.17               |
| P2RY8       | 8                                 | 0.17               |
| STAT3       | 8                                 | 0.17               |
| TNFAIP3     | 8                                 | 0.17               |
| HLA-C       | 7                                 | 0.15               |
| IRF4        | 7                                 | 0.15               |
| MYD88       | 7                                 | 0.15               |
| PDE4DIP     | 7                                 | 0.15               |
| RHPN2       | 7                                 | 0.15               |
| ZNF814      | 7                                 | 0.15               |
| AGA         | 6                                 | 0.13               |
| CREBBP      | 6                                 | 0.13               |
| DOCK5       | 6                                 | 0.13               |
| KDR         | 6                                 | 0.13               |
| TMSB4X      | 6                                 | 0.13               |
| ARID1A      | 5                                 | 0.10               |
| CD79B       | 5                                 | 0.10               |
| CHTA        | 5                                 | 0.10               |
| FAS         | 5                                 | 0.10               |
| FLNC        | 5                                 | 0.10               |
| HLA-A       | 5                                 | 0.10               |
| MYC         | 5                                 | 0.10               |
| NF1         | 5                                 | 0.10               |
| PCDH7       | 5                                 | 0.10               |
| POLQ        | 5                                 | 0.10               |
| SGK1        | 5                                 | 0.10               |
| SOCS1       | 5                                 | 0.10               |
| TLN1        | 5                                 | 0.10               |
| TP53        | 5                                 | 0.10               |
| ACTG1       | 4                                 | 0.08               |
| DDX3X       | 4                                 | 0.08               |
| FLNA        | 4                                 | 0.08               |
| FN1         | 4                                 | 0.08               |
| HLA-B       | 4                                 | 0.08               |
| HLA-DRB1    | 4                                 | 0.08               |
| IL6ST       | 4                                 | 0.08               |
| KLF2        | 4                                 | 0.08               |
| NFKBIE      | 4                                 | 0.08               |
| PABPC1      | 4                                 | 0.08               |
| PGR         | 4                                 | 0.08               |
| PLCG2       | 4                                 | 0.08               |
| PRDM1       | 4                                 | 0.08               |
| RECQL4      | 4                                 | 0.08               |
| RET         | 4                                 | 0.08               |
| TNF         | 4                                 | 0.08               |
| TPR         | 4                                 | 0.08               |
| TYRO3       | 4                                 | 0.08               |

Table SV. Continued.

| Driver gene | Number of patients with mutations | Mutation frequency |
|-------------|-----------------------------------|--------------------|
| UBE2A       | 4                                 | 0.08               |
| UBXN11      | 4                                 | 0.08               |
| UNC13B      | 4                                 | 0.08               |
| ACTB        | 3                                 | 0.06               |
| APMAP       | 3                                 | 0.06               |
| BRCA1       | 3                                 | 0.06               |
| CBX3        | 3                                 | 0.06               |
| CSNK2A1     | 3                                 | 0.06               |
| CXCR4       | 3                                 | 0.06               |
| DHX33       | 3                                 | 0.06               |
| EZH2        | 3                                 | 0.06               |
| FAM161A     | 3                                 | 0.06               |
| GATA3       | 3                                 | 0.06               |
| IKBKB       | 3                                 | 0.06               |
| ITGB4       | 3                                 | 0.06               |
| ITPR1       | 3                                 | 0.06               |
| MAP2K1      | 3                                 | 0.06               |
| MCM8        | 3                                 | 0.06               |
| MLH1        | 3                                 | 0.06               |
| NFKB2       | 3                                 | 0.06               |
| PTCH1       | 3                                 | 0.06               |
| PTPN6       | 3                                 | 0.06               |
| RAF1        | 3                                 | 0.06               |
| RAPGEF3     | 3                                 | 0.06               |
| RIF1        | 3                                 | 0.06               |
| SCYL1       | 3                                 | 0.06               |
| SLC16A8     | 3                                 | 0.06               |
| SMARCA4     | 3                                 | 0.06               |
| SMO         | 3                                 | 0.06               |
| STAT6       | 3                                 | 0.06               |
| TLR4        | 3                                 | 0.06               |
| UBXN2B      | 3                                 | 0.06               |
| VANGL1      | 3                                 | 0.06               |
| ZMYM4       | 3                                 | 0.06               |
| ABCB1       | 2                                 | 0.04               |
| ATP6V0A1    | 2                                 | 0.04               |
| ATR         | 2                                 | 0.04               |
| CCND3       | 2                                 | 0.04               |
| CD44        | 2                                 | 0.04               |
| CDH1        | 2                                 | 0.04               |
| CDKN1A      | 2                                 | 0.04               |
| CGN         | 2                                 | 0.04               |
| CHEK2       | 2                                 | 0.04               |
| CSNK1A1     | 2                                 | 0.04               |
| CYR1        | 2                                 | 0.04               |
| DGCR8       | 2                                 | 0.04               |
| DLGAP1      | 2                                 | 0.04               |
| ECT2L       | 2                                 | 0.04               |
| FAIM        | 2                                 | 0.04               |
| FLT1        | 2                                 | 0.04               |
| FZD1        | 2                                 | 0.04               |
| GATA2       | 2                                 | 0.04               |
| GNAI2       | 2                                 | 0.04               |
| HFE         | 2                                 | 0.04               |
| JAK3        | 2                                 | 0.04               |



Table SV. Continued.

| Driver gene | Number of patients with mutations | Mutation frequency |
|-------------|-----------------------------------|--------------------|
| KITLG       | 2                                 | 0.04               |
| KLRC4       | 2                                 | 0.04               |
| LEPR        | 2                                 | 0.04               |
| LYN         | 2                                 | 0.04               |
| MAP2K3      | 2                                 | 0.04               |
| MMEL1       | 2                                 | 0.04               |
| MSN         | 2                                 | 0.04               |
| NGFR        | 2                                 | 0.04               |
| NOTCH3      | 2                                 | 0.04               |
| NUP153      | 2                                 | 0.04               |
| PDGFRB      | 2                                 | 0.04               |
| PFN1        | 2                                 | 0.04               |
| PLCB4       | 2                                 | 0.04               |
| POLD3       | 2                                 | 0.04               |
| PPP2R2B     | 2                                 | 0.04               |
| PTEN        | 2                                 | 0.04               |
| RHOA        | 2                                 | 0.04               |
| RIMS4       | 2                                 | 0.04               |
| RPTOR       | 2                                 | 0.04               |
| SOS2        | 2                                 | 0.04               |
| TECRL       | 2                                 | 0.04               |
| TLR2        | 2                                 | 0.04               |
| TNPO1       | 2                                 | 0.04               |
| XPO1        | 2                                 | 0.04               |
| ADCY3       | 1                                 | 0.02               |
| ADCY6       | 1                                 | 0.02               |
| AKT2        | 1                                 | 0.02               |
| AXIN2       | 1                                 | 0.02               |
| BIRC2       | 1                                 | 0.02               |
| BMP2        | 1                                 | 0.02               |
| C11orf34    | 1                                 | 0.02               |
| C1orf87     | 1                                 | 0.02               |
| CARS2       | 1                                 | 0.02               |
| CAV1        | 1                                 | 0.02               |
| CBLC        | 1                                 | 0.02               |
| CDKN2A      | 1                                 | 0.02               |
| CDKN2B      | 1                                 | 0.02               |
| COL4A1      | 1                                 | 0.02               |
| CUL1        | 1                                 | 0.02               |
| DIXDC1      | 1                                 | 0.02               |
| E2F2        | 1                                 | 0.02               |
| EIF3B       | 1                                 | 0.02               |
| ETV6        | 1                                 | 0.02               |
| F2R         | 1                                 | 0.02               |
| FGF5        | 1                                 | 0.02               |
| FGGY        | 1                                 | 0.02               |
| FZD7        | 1                                 | 0.02               |
| GAB1        | 1                                 | 0.02               |
| GNAQ        | 1                                 | 0.02               |
| GRB2        | 1                                 | 0.02               |
| GTF2A1      | 1                                 | 0.02               |
| HDAC2       | 1                                 | 0.02               |
| IL6         | 1                                 | 0.02               |
| INHBA       | 1                                 | 0.02               |
| ITGA5       | 1                                 | 0.02               |

Table SV. Continued.

| Driver gene | Number of patients with mutations | Mutation frequency |
|-------------|-----------------------------------|--------------------|
| ITPR2       | 1                                 | 0.02               |
| IZUMO3      | 1                                 | 0.02               |
| JUP         | 1                                 | 0.02               |
| KAT2B       | 1                                 | 0.02               |
| KCNH8       | 1                                 | 0.02               |
| L3MBTL4     | 1                                 | 0.02               |
| LALBA       | 1                                 | 0.02               |
| LAMC1       | 1                                 | 0.02               |
| LARP1B      | 1                                 | 0.02               |
| MAP2K4      | 1                                 | 0.02               |
| MAPK8       | 1                                 | 0.02               |
| MMP2        | 1                                 | 0.02               |
| NCOA2       | 1                                 | 0.02               |
| NOTUM       | 1                                 | 0.02               |
| NTN4        | 1                                 | 0.02               |
| PCK2        | 1                                 | 0.02               |
| PDCL3       | 1                                 | 0.02               |
| PIK3CD      | 1                                 | 0.02               |
| PIK3CG      | 1                                 | 0.02               |
| PPARG       | 1                                 | 0.02               |
| PPP1CA      | 1                                 | 0.02               |
| PPP2CA      | 1                                 | 0.02               |
| PRKCD       | 1                                 | 0.02               |
| PTGS2       | 1                                 | 0.02               |
| RBMS3       | 1                                 | 0.02               |
| RRAS2       | 1                                 | 0.02               |
| RSPO3       | 1                                 | 0.02               |
| SFTPD       | 1                                 | 0.02               |
| SHH         | 1                                 | 0.02               |
| SKP1        | 1                                 | 0.02               |
| SMAD7       | 1                                 | 0.02               |
| SPECC1      | 1                                 | 0.02               |
| STAT1       | 1                                 | 0.02               |
| TCF7L1      | 1                                 | 0.02               |
| TGFB2       | 1                                 | 0.02               |
| TGIF2       | 1                                 | 0.02               |
| TMEM168     | 1                                 | 0.02               |
| TMPO        | 1                                 | 0.02               |
| UBB         | 1                                 | 0.02               |
| VAV3        | 1                                 | 0.02               |
| WNT10A      | 1                                 | 0.02               |
| WNT5A       | 1                                 | 0.02               |
| ZBTB17      | 1                                 | 0.02               |
| ZNF675      | 1                                 | 0.02               |

Mutation frequency was calculated by dividing the number of patients with mutations by 48 patients.

Table SVI. Significant GO terms that are enriched for driver genes in patients with diffuse large B cell lymphoma.

| GO terms                                                                                                                                                                                  | Gene count | P-values              | Benjamini adjusted P-values |
|-------------------------------------------------------------------------------------------------------------------------------------------------------------------------------------------|------------|-----------------------|-----------------------------|
| Stimulatory C-type lectin receptor signaling pathway                                                                                                                                      | 10         | 4.70x10 <sup>-6</sup> | 4.10x10 <sup>-4</sup>       |
| Fc-ε receptor signaling pathway                                                                                                                                                           | 11         | 5.80x10 <sup>-5</sup> | 3.30x10 <sup>-3</sup>       |
| T cell receptor signaling pathway                                                                                                                                                         | 10         | 7.40x10 <sup>-5</sup> | 3.80x10 <sup>-3</sup>       |
| Stress-activated MAPK cascade                                                                                                                                                             | 4          | 1.90x10 <sup>-3</sup> | 4.10x10 <sup>-2</sup>       |
| Replicative senescence                                                                                                                                                                    | 6          | 1.70x10 <sup>-7</sup> | 3.00x10 <sup>-5</sup>       |
| Cellular response to DNA damage stimulus                                                                                                                                                  | 13         | 8.00x10 <sup>-6</sup> | 6.30x10 <sup>-4</sup>       |
| Regulation of signal transduction by p53 class mediator                                                                                                                                   | 8          | 7.30x10 <sup>-4</sup> | 2.00x10 <sup>-2</sup>       |
| DNA damage response, signal transduction by p53 class mediator resulting in transcription of p21 class mediator                                                                           | 4          | 8.40x10 <sup>-4</sup> | 2.20x10 <sup>-2</sup>       |
| DNA damage response, signal transduction by p53 class mediator resulting in cell cycle arrest                                                                                             | 6          | 8.70x10 <sup>-4</sup> | 2.20x10 <sup>-2</sup>       |
| Cellular response to gamma radiation                                                                                                                                                      | 4          | 1.90x10 <sup>-3</sup> | 4.10x10 <sup>-2</sup>       |
| Positive regulation of NF-κB transcription factor activity                                                                                                                                | 10         | 3.20x10 <sup>-5</sup> | 2.20x10 <sup>-3</sup>       |
| Positive regulation of NF-κB import into nucleus                                                                                                                                          | 5          | 1.00x10 <sup>-4</sup> | 5.10x10 <sup>-3</sup>       |
| Positive regulation of interleukin-6 production                                                                                                                                           | 6          | 1.90x10 <sup>-4</sup> | 7.90x10 <sup>-3</sup>       |
| Defense response to Gram-positive bacterium                                                                                                                                               | 7          | 5.40x10 <sup>-4</sup> | 1.60x10 <sup>-2</sup>       |
| Lipopolysaccharide-mediated signaling pathway                                                                                                                                             | 5          | 5.50x10 <sup>-4</sup> | 1.60x10 <sup>-2</sup>       |
| Positive regulation of chemokine production                                                                                                                                               | 4          | 1.00x10 <sup>-3</sup> | 2.50x10 <sup>-2</sup>       |
| Phosphatidylinositol-mediated signaling                                                                                                                                                   | 10         | 5.10x10 <sup>-6</sup> | 4.30x10 <sup>-4</sup>       |
| Phosphatidylinositol phosphorylation                                                                                                                                                      | 8          | 1.30x10 <sup>-4</sup> | 6.00x10 <sup>-3</sup>       |
| Phosphatidylinositol-3-phosphate biosynthetic process                                                                                                                                     | 6          | 2.90x10 <sup>-4</sup> | 1.00x10 <sup>-2</sup>       |
| Regulation of phosphatidylinositol 3-kinase signaling                                                                                                                                     | 7          | 3.40x10 <sup>-4</sup> | 1.20x10 <sup>-2</sup>       |
| I-kappaB kinase/NF-kappaB signaling                                                                                                                                                       | 7          | 8.00x10 <sup>-5</sup> | 4.10x10 <sup>-3</sup>       |
| Regulation of tumor necrosis factor-mediated signaling pathway                                                                                                                            | 5          | 4.30x10 <sup>-4</sup> | 1.40x10 <sup>-2</sup>       |
| Positive regulation of interleukin-6 production                                                                                                                                           | 6          | 1.90x10 <sup>-4</sup> | 7.90x10 <sup>-3</sup>       |
| Cellular response to lipopolysaccharide                                                                                                                                                   | 7          | 2.40x10 <sup>-3</sup> | 4.90x10 <sup>-2</sup>       |
| Interferon-gamma-mediated signaling pathway                                                                                                                                               | 10         | 1.70x10 <sup>-7</sup> | 3.10x10 <sup>-5</sup>       |
| Antigen processing and presentation of exogenous peptide antigen via MHC class I, TAP-independent                                                                                         | 4          | 1.30x10 <sup>-4</sup> | 6.10x10 <sup>-3</sup>       |
| Antigen processing and presentation of endogenous peptide antigen via major histocompatibility complex class I via Estrogen receptor pathway, tracheal antimicrobial peptide -independent | 3          | 4.20x10 <sup>-4</sup> | 1.40x10 <sup>-2</sup>       |
| Antigen processing and presentation of peptide antigen via MHC class I                                                                                                                    | 5          | 4.30x10 <sup>-4</sup> | 1.40x10 <sup>-2</sup>       |
| Interleukin-6-mediated signaling pathway                                                                                                                                                  | 4          | 1.30x10 <sup>-4</sup> | 6.10x10 <sup>-3</sup>       |
| Vascular endothelial growth factor receptor signaling pathway                                                                                                                             | 6          | 1.70x10 <sup>-3</sup> | 3.70x10 <sup>-2</sup>       |
| Ras protein signal transduction                                                                                                                                                           | 6          | 1.50x10 <sup>-3</sup> | 3.50x10 <sup>-2</sup>       |
| Extracellular matrix organization                                                                                                                                                         | 11         | 1.30x10 <sup>-4</sup> | 5.90x10 <sup>-3</sup>       |
| Stress-activated mitogen-activated protein kinase cascade                                                                                                                                 | 4          | 1.90x10 <sup>-3</sup> | 4.10x10 <sup>-2</sup>       |
| Renal system development                                                                                                                                                                  | 4          | 5.60x10 <sup>-4</sup> | 1.60x10 <sup>-2</sup>       |
| Negative regulation of fat cell differentiation                                                                                                                                           | 5          | 1.60x10 <sup>-3</sup> | 3.60x10 <sup>-2</sup>       |

In order to characterize the functional enrichment of all driver genes, GO (1) controlled vocabulary that can be applied to all eukaryotes even as knowledge of gene and protein roles in cells is accumulating and changing. To this end, three independent ontologies accessible on the World-Wide Web (<http://www.geneontology.org> biological process term analysis (1) was performed with The Database for Annotation, Visualization and Integrated Discovery (DAVID) (<https://david.ncifcrf.gov/>) (2). (1) Ashburner M, Ball CA, Blake JA, *et al*: Gene ontology: Tool for the unification of biology. The Gene Ontology Consortium. *Nat Genet* 25: 25-29, 2000. (2) Huang DW, Sherman BT and Lempicki RA: Bioinformatics enrichment tools: Paths toward the comprehensive functional analysis of large gene lists. 37: 1-13, 2009.

Table SVII. Significant KEGG pathways that are enriched for driver genes.

| KEGG pathway                                         | Gene count | P-value                | Benjamini adjusted P-value |
|------------------------------------------------------|------------|------------------------|----------------------------|
| Hepatitis B                                          | 26         | 9.10x10 <sup>-16</sup> | 4.40x10 <sup>-14</sup>     |
| Endometrial cancer                                   | 15         | 4.50x10 <sup>-12</sup> | 1.10x10 <sup>-10</sup>     |
| Forkhead box, sub-group O signaling pathway          | 21         | 1.40x10 <sup>-11</sup> | 2.70x10 <sup>-10</sup>     |
| Chronic myeloid leukemia                             | 16         | 4.20x10 <sup>-11</sup> | 6.90x10 <sup>-10</sup>     |
| Glioma                                               | 15         | 1.20x10 <sup>-10</sup> | 1.70x10 <sup>-9</sup>      |
| B cell receptor signaling pathway                    | 15         | 2.80x10 <sup>-10</sup> | 3.70x10 <sup>-9</sup>      |
| Prostate cancer                                      | 16         | 8.40x10 <sup>-10</sup> | 9.80x10 <sup>-9</sup>      |
| Pancreatic cancer                                    | 14         | 1.50x10 <sup>-9</sup>  | 1.60x10 <sup>-8</sup>      |
| Fc epsilon RI signaling pathway                      | 14         | 2.70x10 <sup>-9</sup>  | 2.50x10 <sup>-8</sup>      |
| Acute myeloid leukemia                               | 13         | 2.90x10 <sup>-9</sup>  | 2.50x10 <sup>-8</sup>      |
| Melanoma                                             | 14         | 4.70x10 <sup>-9</sup>  | 3.80x10 <sup>-8</sup>      |
| Erb-b2 receptor tyrosine kinase signaling pathway    | 15         | 6.90x10 <sup>-9</sup>  | 4.90x10 <sup>-8</sup>      |
| Colorectal cancer                                    | 13         | 9.80x10 <sup>-9</sup>  | 6.80x10 <sup>-8</sup>      |
| Chemokine signaling pathway                          | 20         | 3.10x10 <sup>-8</sup>  | 1.90x10 <sup>-7</sup>      |
| Non-small cell lung cancer                           | 12         | 3.50x10 <sup>-8</sup>  | 2.10x10 <sup>-7</sup>      |
| Neurotrophin signaling pathway                       | 16         | 6.70x10 <sup>-8</sup>  | 3.60x10 <sup>-7</sup>      |
| Ras signaling pathway                                | 21         | 1.50x10 <sup>-7</sup>  | 7.60x10 <sup>-7</sup>      |
| Bladder cancer                                       | 10         | 2.40x10 <sup>-7</sup>  | 1.20x10 <sup>-6</sup>      |
| Hepatitis C                                          | 16         | 2.70x10 <sup>-7</sup>  | 1.30x10 <sup>-6</sup>      |
| T cell receptor signaling pathway                    | 14         | 3.30x10 <sup>-7</sup>  | 1.50x10 <sup>-6</sup>      |
| Central carbon metabolism in cancer                  | 11         | 1.40x10 <sup>-6</sup>  | 5.30x10 <sup>-6</sup>      |
| Prolactin signaling pathway                          | 11         | 3.80x10 <sup>-6</sup>  | 1.30x10 <sup>-5</sup>      |
| Osteoclast differentiation                           | 14         | 7.30x10 <sup>-6</sup>  | 2.50x10 <sup>-5</sup>      |
| Cathelicidin antimicrobial peptide signaling pathway | 17         | 9.30x10 <sup>-6</sup>  | 3.10x10 <sup>-5</sup>      |
| Insulin signaling pathway                            | 14         | 1.30x10 <sup>-5</sup>  | 4.20x10 <sup>-5</sup>      |
| Renal cell carcinoma                                 | 10         | 1.50x10 <sup>-5</sup>  | 4.90x10 <sup>-5</sup>      |
| Progesterone-mediated oocyte maturation              | 10         | 1.40x10 <sup>-4</sup>  | 3.90x10 <sup>-4</sup>      |
| Natural killer cell mediated cytotoxicity            | 11         | 4.20x10 <sup>-4</sup>  | 1.10x10 <sup>-3</sup>      |
| Vascular endothelial growth factor signaling pathway | 8          | 4.20x10 <sup>-4</sup>  | 1.10x10 <sup>-3</sup>      |
| Choline metabolism in cancer                         | 10         | 4.40x10 <sup>-4</sup>  | 1.10x10 <sup>-3</sup>      |
| Fc $\gamma$ R-mediated phagocytosis                  | 9          | 5.90x10 <sup>-4</sup>  | 1.40x10 <sup>-3</sup>      |
| Cyclic GMP- Protein Kinase G signaling pathway       | 12         | 8.80x10 <sup>-4</sup>  | 2.00x10 <sup>-3</sup>      |
| Chagas disease (American trypanosomiasis)            | 18         | 1.20x10 <sup>-10</sup> | 1.80x10 <sup>-9</sup>      |
| Influenza A                                          | 21         | 1.70x10 <sup>-9</sup>  | 1.70x10 <sup>-8</sup>      |
| Toll-like receptor signaling pathway                 | 14         | 6.60x10 <sup>-7</sup>  | 2.70x10 <sup>-6</sup>      |
| Tumor necrosis factor signaling pathway              | 14         | 7.30x10 <sup>-7</sup>  | 2.90x10 <sup>-6</sup>      |
| Insulin resistance                                   | 12         | 3.00x10 <sup>-5</sup>  | 9.20x10 <sup>-5</sup>      |
| Apoptosis                                            | 9          | 7.00x10 <sup>-5</sup>  | 2.00x10 <sup>-4</sup>      |
| Type II diabetes mellitus                            | 7          | 6.90x10 <sup>-4</sup>  | 1.60x10 <sup>-3</sup>      |
| Adipocytokine signaling pathway                      | 8          | 9.80x10 <sup>-4</sup>  | 2.20x10 <sup>-3</sup>      |
| Mammalian target of rapamycin signaling pathway      | 7          | 1.90x10 <sup>-3</sup>  | 4.00x10 <sup>-3</sup>      |
| Non-alcoholic fatty liver disease                    | 9          | 2.10x10 <sup>-2</sup>  | 3.60x10 <sup>-2</sup>      |
| Cell cycle                                           | 16         | 1.00x10 <sup>-7</sup>  | 5.50x10 <sup>-7</sup>      |
| p53 signaling pathway                                | 9          | 1.20x10 <sup>-4</sup>  | 3.40x10 <sup>-4</sup>      |
| Toxoplasmosis                                        | 17         | 2.50x10 <sup>-9</sup>  | 2.40x10 <sup>-8</sup>      |
| Tuberculosis                                         | 15         | 4.40x10 <sup>-5</sup>  | 1.30x10 <sup>-4</sup>      |
| Inflammatory bowel disease (IBD)                     | 9          | 8.80x10 <sup>-5</sup>  | 2.50x10 <sup>-4</sup>      |
| Leishmaniasis                                        | 9          | 1.90x10 <sup>-4</sup>  | 4.90x10 <sup>-4</sup>      |
| Pertussis                                            | 8          | 1.50x10 <sup>-3</sup>  | 3.20x10 <sup>-3</sup>      |
| Rheumatoid arthritis                                 | 8          | 3.70x10 <sup>-3</sup>  | 7.10x10 <sup>-3</sup>      |
| Malaria                                              | 6          | 4.80x10 <sup>-3</sup>  | 9.00x10 <sup>-3</sup>      |
| Legionellosis                                        | 6          | 7.30x10 <sup>-3</sup>  | 1.30x10 <sup>-2</sup>      |
| Estrogen signaling pathway                           | 17         | 5.10x10 <sup>-10</sup> | 6.30x10 <sup>-9</sup>      |
| GnRH signaling pathway                               | 16         | 1.40x10 <sup>-9</sup>  | 1.50x10 <sup>-8</sup>      |
| Platelet activation                                  | 18         | 4.20x10 <sup>-9</sup>  | 3.50x10 <sup>-8</sup>      |
| Gap junction                                         | 13         | 5.60x10 <sup>-7</sup>  | 2.30x10 <sup>-6</sup>      |

Table SVII. Continued.

| KEGG pathway                                         | Gene count | P-value               | Benjamini adjusted P-value |
|------------------------------------------------------|------------|-----------------------|----------------------------|
| Oxytocin signaling pathway                           | 16         | 1.30x10 <sup>-6</sup> | 4.90x10 <sup>-6</sup>      |
| Inflammatory mediator regulation of TRP channels     | 13         | 1.80x10 <sup>-6</sup> | 6.70x10 <sup>-6</sup>      |
| Long-term depression                                 | 9          | 5.50x10 <sup>-5</sup> | 1.60x10 <sup>-4</sup>      |
| Long-term potentiation                               | 9          | 1.10x10 <sup>-4</sup> | 3.10x10 <sup>-4</sup>      |
| Cholinergic synapse                                  | 11         | 1.90x10 <sup>-4</sup> | 5.10x10 <sup>-4</sup>      |
| Vascular smooth muscle contraction                   | 11         | 3.00x10 <sup>-4</sup> | 7.80x10 <sup>-4</sup>      |
| Cyclic GMP- Protein Kinase G signaling pathway       | 12         | 8.80x10 <sup>-4</sup> | 2.00x10 <sup>-3</sup>      |
| Oocyte meiosis                                       | 10         | 8.80x10 <sup>-4</sup> | 2.00x10 <sup>-3</sup>      |
| Retrograde endocannabinoid signaling                 | 9          | 2.00x10 <sup>-3</sup> | 4.10x10 <sup>-3</sup>      |
| Dopaminergic synapse                                 | 10         | 2.40x10 <sup>-3</sup> | 4.90x10 <sup>-3</sup>      |
| Serotonergic synapse                                 | 9          | 3.60x10 <sup>-3</sup> | 7.00x10 <sup>-3</sup>      |
| Adrenergic signaling in cardiomyocytes               | 10         | 4.00x10 <sup>-3</sup> | 7.60x10 <sup>-3</sup>      |
| Gastric acid secretion                               | 7          | 6.00x10 <sup>-3</sup> | 1.10x10 <sup>-2</sup>      |
| Renin secretion                                      | 6          | 1.50x10 <sup>-2</sup> | 2.60x10 <sup>-2</sup>      |
| Glutamatergic synapse                                | 8          | 1.50x10 <sup>-2</sup> | 2.60x10 <sup>-2</sup>      |
| Pancreatic secretion                                 | 7          | 1.90x10 <sup>-2</sup> | 3.20x10 <sup>-2</sup>      |
| Thyroid hormone synthesis                            | 6          | 2.10x10 <sup>-2</sup> | 3.60x10 <sup>-2</sup>      |
| Glucagon signaling pathway                           | 7          | 2.50x10 <sup>-2</sup> | 4.10x10 <sup>-2</sup>      |
| Graft-versus-host disease                            | 7          | 8.20x10 <sup>-5</sup> | 2.40x10 <sup>-4</sup>      |
| Allograft rejection                                  | 6          | 1.40x10 <sup>-3</sup> | 3.10x10 <sup>-3</sup>      |
| Antigen processing and presentation                  | 8          | 1.60x10 <sup>-3</sup> | 3.40x10 <sup>-3</sup>      |
| Viral myocarditis                                    | 7          | 1.70x10 <sup>-3</sup> | 3.70x10 <sup>-3</sup>      |
| Type I diabetes mellitus                             | 6          | 2.40x10 <sup>-3</sup> | 4.90x10 <sup>-3</sup>      |
| Autoimmune thyroid disease                           | 5          | 3.00x10 <sup>-2</sup> | 4.80x10 <sup>-2</sup>      |
| Vascular endothelial growth factor signaling pathway | 8          | 4.20x10 <sup>-4</sup> | 1.10x10 <sup>-3</sup>      |
| Regulation of lipolysis in adipocytes                | 7          | 1.60x10 <sup>-3</sup> | 3.40x10 <sup>-3</sup>      |
| Pathogenic Escherichia coli infection                | 5          | 2.80x10 <sup>-2</sup> | 4.60x10 <sup>-2</sup>      |
| Dilated cardiomyopathy                               | 8          | 2.80x10 <sup>-3</sup> | 5.70x10 <sup>-3</sup>      |
| Hypertrophic cardiomyopathy                          | 7          | 8.30x10 <sup>-3</sup> | 1.50x10 <sup>-2</sup>      |
| Arrhythmogenic right ventricular cardiomyopathy      | 6          | 1.80x10 <sup>-2</sup> | 3.10x10 <sup>-2</sup>      |
| Hedgehog signaling pathway                           | 4          | 2.20x10 <sup>-2</sup> | 3.80x10 <sup>-2</sup>      |
| Phosphatidylinositol signaling system                | 7          | 2.40x10 <sup>-2</sup> | 3.90x10 <sup>-2</sup>      |

In order to characterize the functional enrichment of all driver genes, KEGG (1) controlled vocabulary that can be applied to all eukaryotes even as knowledge of gene and protein roles in cells is accumulating and changing. To this end, three independent ontologies accessible on the World-Wide Web (<http://www.geneontology.org> pathway analysis (1) was performed with The Database for Annotation, Visualization and Integrated Discovery (DAVID) (<https://david.ncifcrf.gov/>) (2). (1) Ogata H, Goto S, Sato K, Fujibuchi W, Bono H and Kanehisa M: KEGG: Kyoto encyclopedia of genes and genomes. *Nucleic Acids Res* 27: 29-34, 1999. (2) Huang DW, Sherman BT and Lempicki RA: Bioinformatics enrichment tools: Paths toward the comprehensive functional analysis of large gene lists. 37: 1-13, 2009.

Table SVIII. Linear regression model analysis between overall survival in patients with diffuse large B cell lymphoma and clinicopathological features.

| Clinical features | T-value | P-value |
|-------------------|---------|---------|
| Age, years        | -0.1    | 0.91    |
| Clinical stage    | 0.73    | 0.47    |
| Sex               | 0.58    | 0.56    |
| Radiation therapy | -1.12   | 0.27    |
| Ethnicity         | -1.55   | 0.13    |

P<0.05 was predefined statistically significant. Clinical stage was evaluated based on the Ann Arbor staging system (1). (1) Carbone PP, Kaplan HS, Musshoff K, Smithers DW and Tubiana M: Report of the Committee on Hodgkin's Disease Staging Classification. Cancer Res 31: 1860LP-1861, 1971.
